# Supplementary material for: Impact of Mobile Crisis Services on Emergency Department Use Among Youths With Behavioral Health Service Needs
Source: Atypon-hosted journal article supplement (doi:10.1176/appi.ps.201800450), 2019-06-19
Supplement: appi.ps.201800450.ds001.pdf [file appi.ps.201800450.ds001.pdf]

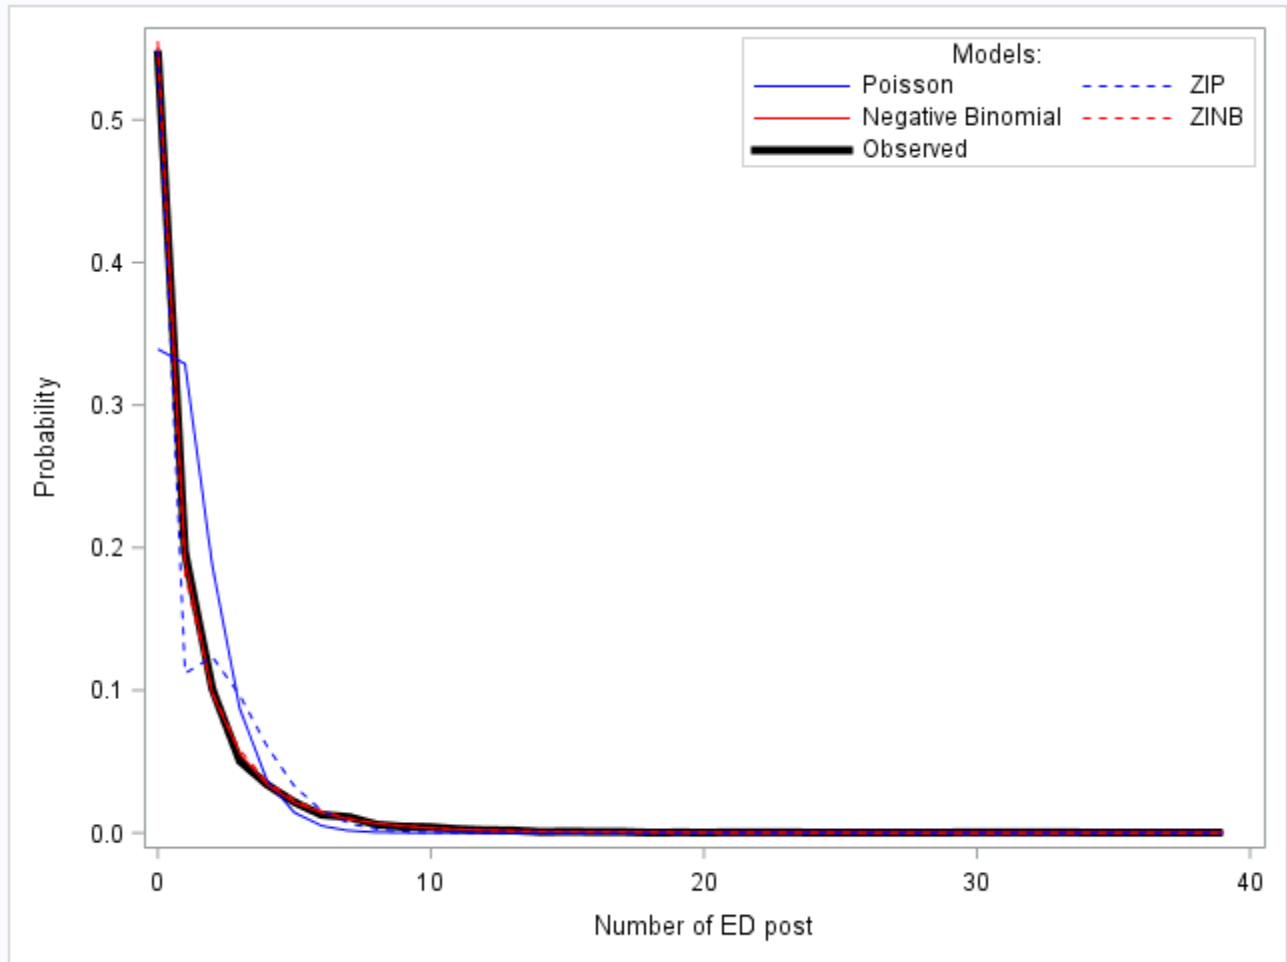

Supplemental Figure 1

Observed and predicted probability of behavioral health-related emergency department service use counts across four different models<sup>1,2,3,4,5</sup>

- 1Poisson
- 2Negative binomial
- 3Zero inflated Poisson
- 4Zero inflated negative binomial
- 5Observed service use
